# Supplementary material
Source: HighWire-hosted journal article supplement (http://www.cmaj.ca/highwire/filestream/77812/field_highwire_adjunct_files/0/202345-com-1-at.pdf)
Supplement: 202345-com-1-at.pdf [file 202345-com-1-at.pdf]

**Appendix 1 (as submitted by the authors):** Summary of guideline recommendations from the *WHO Guidelines on Physical Activity and Sedentary Behaviour*<sup>1</sup> and the *Canadian 24-Hour Movement Guidelines for Adults aged 18–64 years and Adults aged 65 years or older: An Integration of Physical Activity, Sedentary Behaviour, and Sleep*.<sup>2</sup>

| <b>Movement Behaviour</b>                         | <b>WHO Guidelines</b>                                                                                                                                                                                                                                                                                                                                                                                                                                                                                                                                                                                                                            | <b>Canadian Guidelines</b>                                                                                                                                                                                                                                                      |
|---------------------------------------------------|--------------------------------------------------------------------------------------------------------------------------------------------------------------------------------------------------------------------------------------------------------------------------------------------------------------------------------------------------------------------------------------------------------------------------------------------------------------------------------------------------------------------------------------------------------------------------------------------------------------------------------------------------|---------------------------------------------------------------------------------------------------------------------------------------------------------------------------------------------------------------------------------------------------------------------------------|
| moderate- to vigorous-intensity physical activity | <p>Adults should do at least 150 minutes to 300 minutes of moderate-intensity aerobic physical activity, or do at least 75 to 150 minutes of vigorous-intensity aerobic physical activity, or an equivalent combination of moderate- and vigorous-intensity activity throughout the week</p> <p>Muscle strengthening activities at moderate or greater intensity that involve all major muscle groups on 2 or more days a week</p> <p>Older adults (65 years and older) should do varied multicomponent physical activity that emphasizes functional balance and strength training at moderate or greater intensity on 3 or more days a week</p> | <p>Aerobic physical activities such that there is an accumulation of at least 150 minutes per week</p> <p>Muscle strengthening activities using major muscle groups at least twice a week</p> <p>Physical activities that challenge balance (for adults 65 years and older)</p> |
| light physical activity                           | No Recommendation                                                                                                                                                                                                                                                                                                                                                                                                                                                                                                                                                                                                                                | Several hours of light physical activities, including standing                                                                                                                                                                                                                  |
| sedentary behaviour                               | Adults should limit the amount of time spent being sedentary                                                                                                                                                                                                                                                                                                                                                                                                                                                                                                                                                                                     | Limit sedentary time to 8 hours or less, which includes no more than 3 hours of recreational screen time, and break up long periods of sitting as often as possible                                                                                                             |
| sleep                                             | No Recommendation                                                                                                                                                                                                                                                                                                                                                                                                                                                                                                                                                                                                                                | 7 to 9 (adults 18-64 years) 7 to 8 (adults 65 years or older) hours of good-quality sleep on a regular basis, with consistent bed and wake-up times                                                                                                                             |
| behaviour integration                             | Replacing sedentary time with physical activity of any intensity (including light intensity) has health benefits                                                                                                                                                                                                                                                                                                                                                                                                                                                                                                                                 | Replacing sedentary behaviour with additional physical activity and trading light physical activity for more moderate to vigorous physical activity, while preserving sufficient sleep, can provide greater health benefits                                                     |

## References

1. Bull FC, Al-Ansari SS, Biddle S, et al. World Health Organization 2020 guidelines on physical activity and sedentary behaviour. *Br J Sports Med*. 2020 Nov. 26 [Epub ahead of print]. doi:10.1136/bjsports-2020-102955.
2. Ross R, Chaput J-P, Giangregorio LM, et al. Canadian 24-hour movement guidelines for adults aged 18–64 years and adults aged 65 years or older: an integration of physical activity, sedentary behaviour, and sleep. *Appl Physiol Nutr Metab* Oct;45(Suppl 2):S57-S102.
